# Supplementary material
Source: Research Square preprint supplement (doi:10.21203/rs.3.rs-9910336/v1)
Supplement: Supplementary file 1 [file 915e7b2b3fe3de6349a09b4b.pdf]

1           Supplementary material for "Gyre dynamics modulate  
2           northward throughput of Gulf Stream water to subpolar  
3           latitudes"

4    Authors: Helene Asbjørnsen, Lea Svendsen, Yanchun He, Tillys Petit

5    Contents of this file: Figure S1, Figure S2, Figure S3, Figure S4, Figure S5, Figure S6, Figure S7

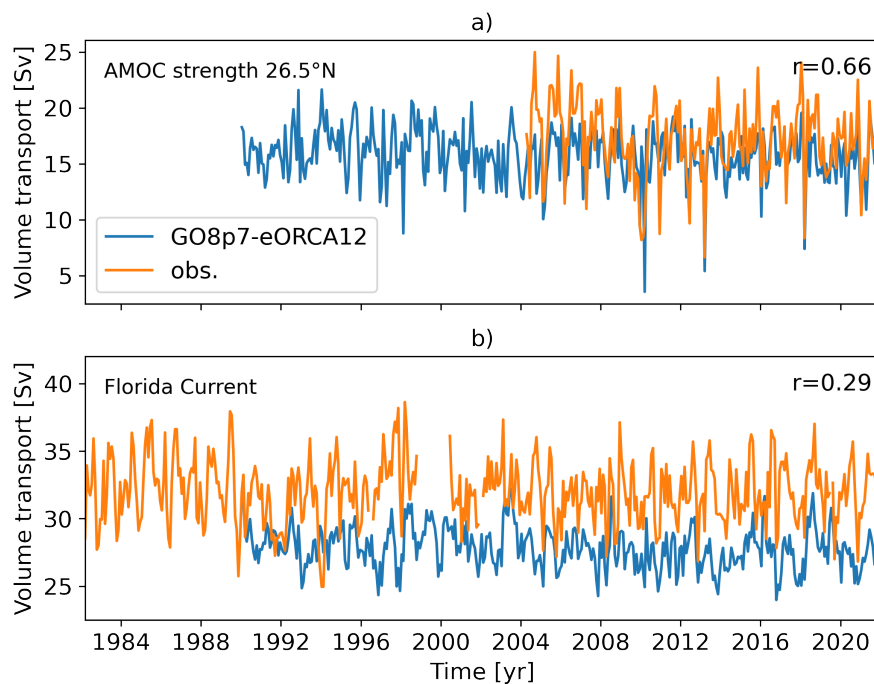

**Fig. S1** Comparison with observations. (a) Monthly mean overturning strength in the GO8p7-eORCA12 hindcast at 26.5°N (Jan. 1990 - Dec. 2021) and the overturning strength measured at the RAPID array (Apr. 2004 - Dec. 2021). The overturning strength is here the maximum of the depth-space overturning stream function. (b) Monthly mean Florida Current volume transport in the GO8p7-eORCA12 hindcast at 26.5°N (Jan. 1990 - Dec. 2021) and the Florida Current volume transport from cable measurements in the Florida Straits (Mar. 1982 - Dec. 2021).

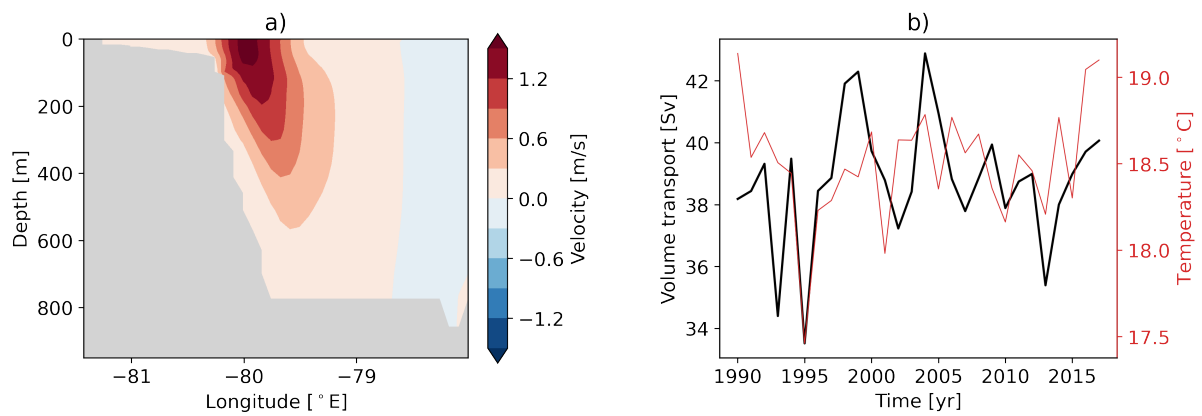

**Fig. S2** Seeding section at 30°N. (a) Time mean meridional velocity at the 30°N particle seeding section. Particles are seeded monthly during 1990-2017 in all grid cells with a positive meridional velocity. (b) Annual mean Gulf Stream volume transport (northward velocities only) at the seeding section during 1990-2017 (black line; left axis). Annual mean temperature of the Gulf Stream water at the seeding section during 1990-2017 (thin red line; right axis). The time average volume transport is  $38.7 \pm 2.0$  Sv, while the time average temperature is  $18.5 \pm 0.3$  °C.

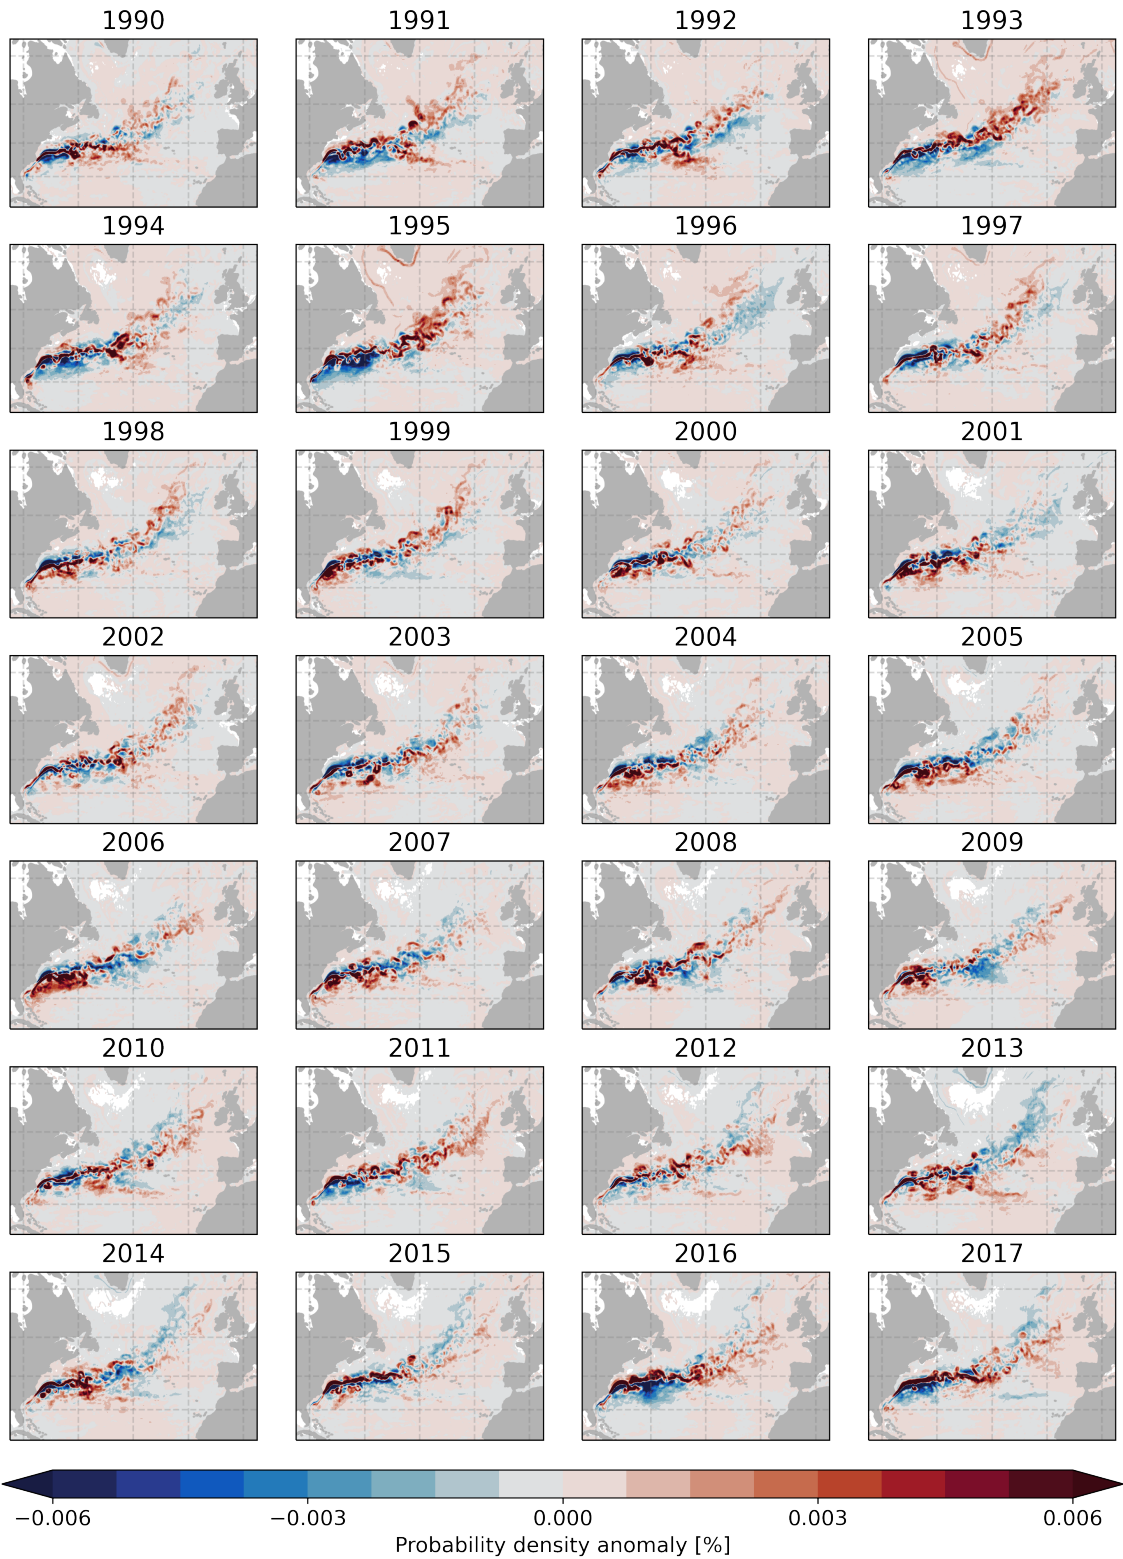

**Fig. S3** Particle probability density anomaly. Anomaly from the mean volume weighted probability density distribution (seen in Figure 1b) for each seeding year between 1990 and 2017.

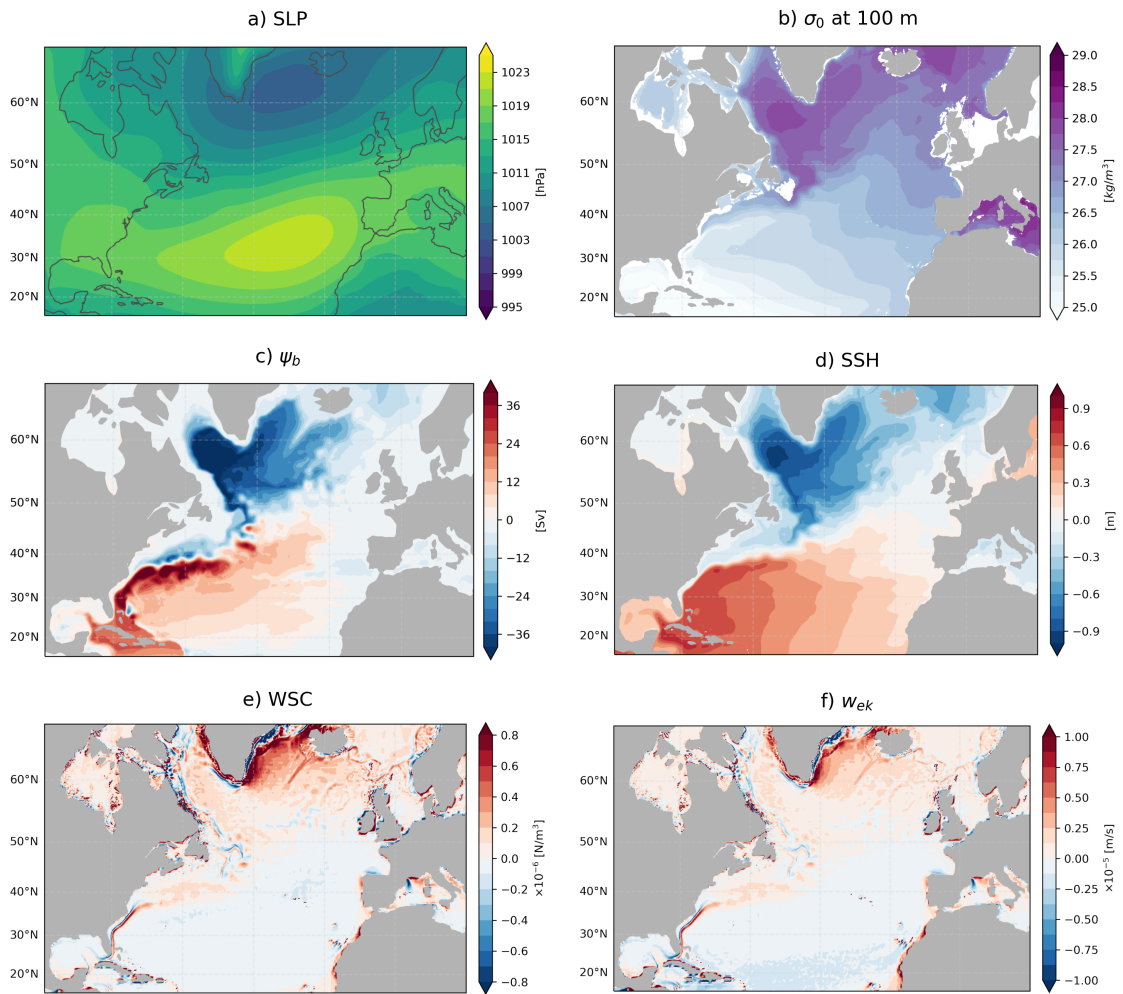

**Fig. S4** Climatological fields for the 1990-2021 period. (a) Sea level pressure in hectopascal ('SLP';  $hPa$ ), (b) Potential density at 100m depth in kilogram per cubic meter (' $\sigma_0$ ';  $kg/m^3$ ). (c) Barotropic streamfunction in Sverdrup (' $\psi_b$ ';  $Sv$ ). (d) Sea surface height in meter ('SSH';  $m$ ). (e) Wind stress curl in Newton per cubic meter ('WSC';  $N/m^3$ ). (f) Vertical Ekman velocity in meter per second (' $w_{ek}$ ';  $m/s$ ; positive upward).

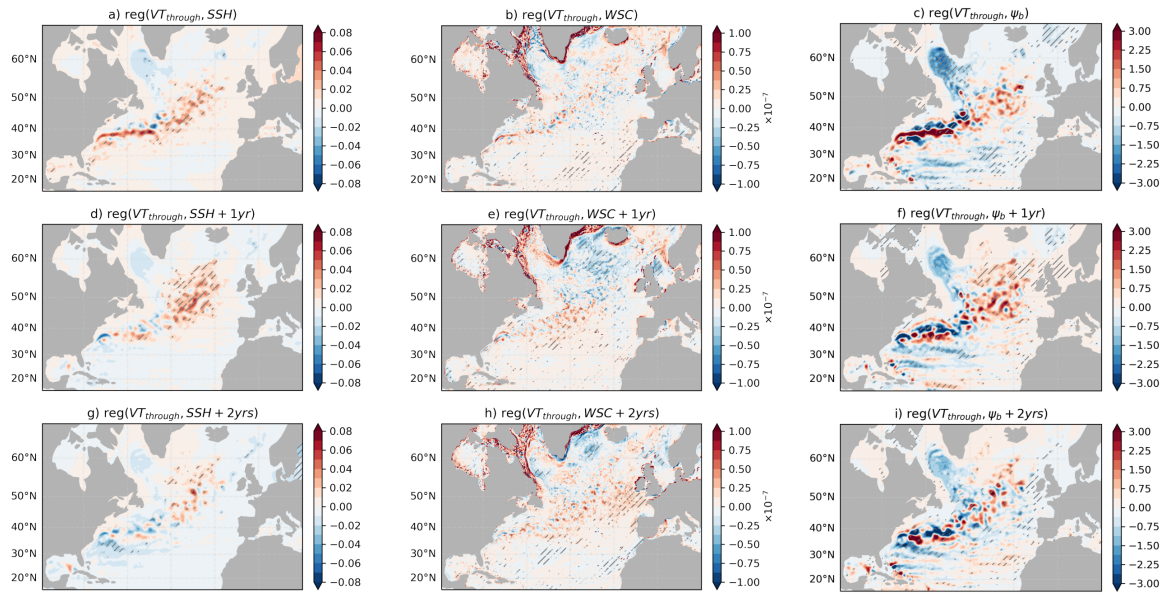

**Fig. S5** Throughput variability and large-scale patterns in sea surface height, wind stress curl, and barotropic streamfunction. (a,d,g) Annual mean sea surface height ( $SSH$ ;  $m$ ) regressed onto the annual mean throughput time series ( $through$ ;  $Sv$ ). The unit is  $m$  per standard deviation of volume transport. (b,e,h) Annual mean wind stress curl ( $WSC$ ,  $N/m^3$ ) regressed onto the annual mean throughput time series ( $through$ ;  $Sv$ ). The unit is  $N/m^3$  per standard deviation of volume transport. (c,f,i) Annual mean barotropic streamfunction ( $\psi_b$ ,  $Sv$ ) regressed onto the annual mean throughput time series ( $through$ ;  $Sv$ ). The unit is  $Sv$  per standard deviation of volume transport. Because the throughput time series is sorted by the seeding year at  $30^\circ N$  and the particles typically use between three months to two years to reach  $45^\circ N$ , we show the regression at zero lag (a-c),  $SSH$ ,  $WSC$ ,  $\psi_b$  lagging with one year (d-f), and  $SSH$ ,  $WSC$ ,  $\psi_b$  lagging with two years (g-i). (a-i) Significance at the 90% confidence level is indicated in hatching.

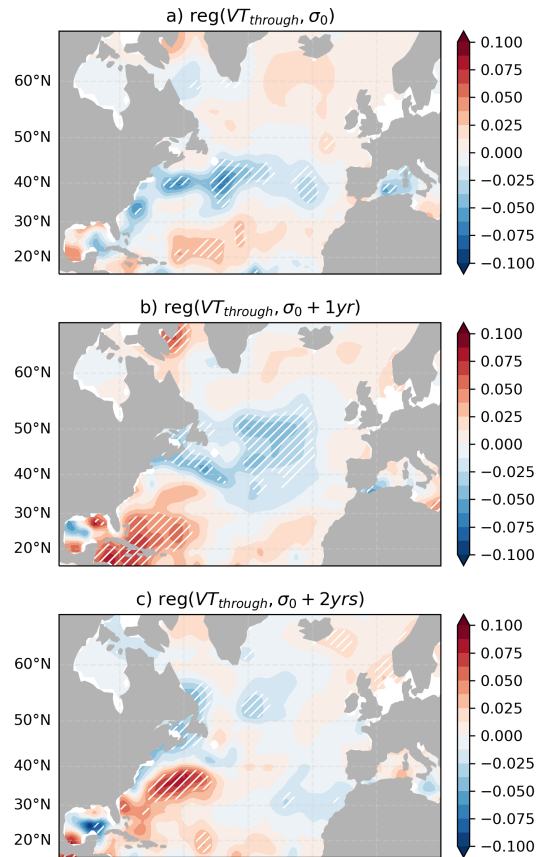

**Fig. S6** Throughput variability and large-scale patterns in observed subsurface densities. Annual mean potential density at 100 m depth ( $\sigma_0$ ;  $kg/m^3$ ) from the EN4.2.2 gridded observational product regressed onto the annual mean throughput time series ('through';  $Sv$ ). The throughput time series has been standardized and the unit is  $kg/m^3$  per standard deviation of volume transport. Significance at the 90% confidence level is indicated in hatching.

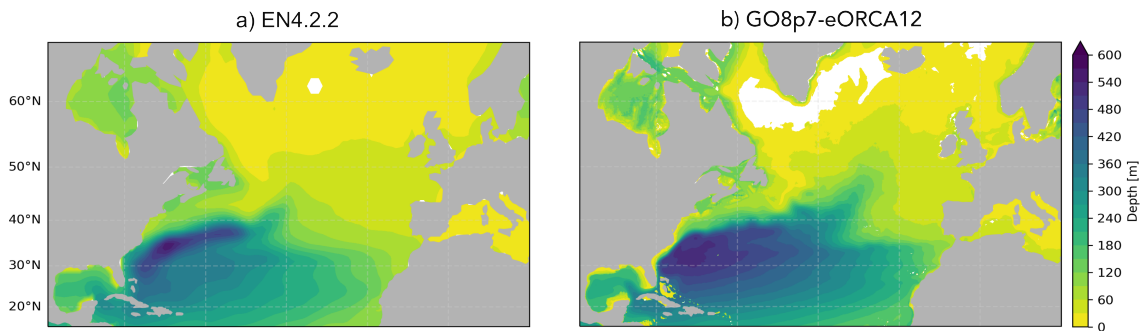

**Fig. S7** Depth of the  $\sigma_0 = 26.5 \text{ kg}/m^3$  isopycnal averaged over the 1990-2021 period in (a) the EN4.2.2 gridded observational product and in (b) the GO8p7-eORCA12 ocean hindcast.
